# Supplementary material
Source: MDPI journal article supplement (https://www.mdpi.com/2071-1050/14/6/3296)
Supplement: s1 [file s1]

## Supplementary Material

Figure S1: Meal sales by experimental week and dish content

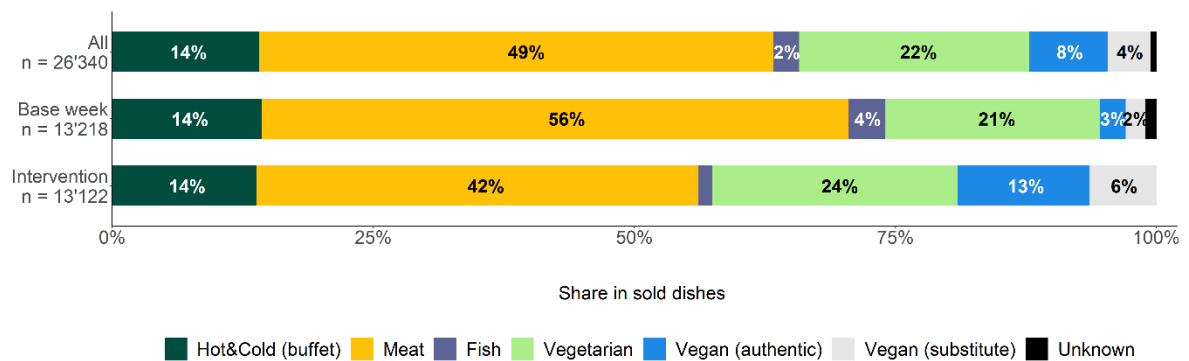

**Figure S1.** Meal sales by experimental week and dish content (Data set of total meal sales  $N = 26,340$ ).

Figure S2: Lunch types

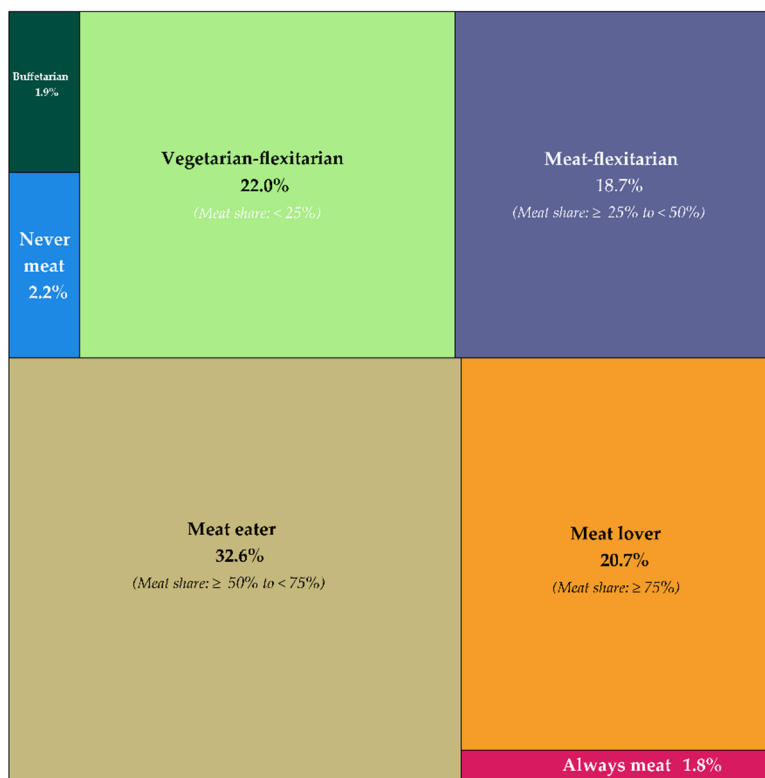

**Figure S2.** Regular canteen visitors by lunch type ( $n = 990$ ). According to the frequency with which they purchased meat dishes, regular canteen visitors were categorized into seven lunch types: 'Buffetarian' ( $n = 19$ ), 'Never meat' ( $n = 22$ ), 'Vegetarian-flexitarian' ( $n = 218$ ), 'Meat-flexitarian' ( $n = 185$ ), 'Meat eater' ( $n = 323$ ), 'Meat lover' ( $n = 205$ ) and 'Always meat' ( $n = 18$ ) (Data subset of total meal sales to regular canteen visitors  $n = 19,761$ ).

Table S1: Comparison of regular canteen visitors with university population.

**Table S1.** Comparison of regular canteen visitors with university population. Among regular canteen visitors, female students are underrepresented and male students and staff overrepresented.

| Gender and<br>University<br>Affiliation | Population of<br>Students and Staff<br>(December 2017)<br><i>N</i> = 2,219 | Regular Canteen<br>Visitors (Autumn<br>Semester 2017)<br><i>n</i> = 990 |
|-----------------------------------------|----------------------------------------------------------------------------|-------------------------------------------------------------------------|
| <i>Students</i>                         | 69.2%                                                                      | 64.5%                                                                   |
| Female                                  | 32.4%                                                                      | 23.5%                                                                   |
| Male                                    | 36.8%                                                                      | 41.0%                                                                   |
| <i>Staff</i>                            | 30.8%                                                                      | 35.5%                                                                   |
| Female                                  | 15.5%                                                                      | 17.2%                                                                   |
| Male                                    | 15.3%                                                                      | 18.3%                                                                   |
| All                                     | 100.0%                                                                     | 100.0%                                                                  |
